# Supplementary material for: Tuning the electronic properties of ZnO nanofilms via strain-induced structural phase transformations and quantum confinement
Source: Royal Society of Chemistry journal article supplement (doi:10.1039/d4nr05206d), 2025-01-01
Supplement: d4nr05206d1.pdf [file d4nr05206d1.pdf]

## Electronic Supplementary Information for:

# Tuning the Electronic Properties of ZnO Nanofilms via Strain-induced Structural Phase Transformations and Quantum Confinement

Raul Morales-Salvador<sup>1</sup>, Ilker Demiroglu<sup>2</sup>, Francesc Viñes<sup>1</sup>, Stefan T. Bromley<sup>\*1,3</sup>

<sup>1</sup> *Departament de Ciència de Materials i Química Física & Institut de Química Teòrica i Computacional (IQTC), Universitat de Barcelona, c/ Martí i Franquès 1-11, 08028 Barcelona, Spain.*

<sup>2</sup> *Department of Advanced Technologies, Eskisehir Technical University, 2 Eylül kampüsü, 26555 Eskişehir, Turkey*

<sup>3</sup> *Institució Catalana de Recerca i Estudis Avançats (ICREA), Passeig de Lluís Companys, 23, 08010 Barcelona (Spain).*

\*Corresponding author: [s.bromley@ub.edu](mailto:s.bromley@ub.edu)

**S1. Convergence tests.**

**S2. Comparison between PBE and PBE0**

**S3. Out-of-plane Zn-Zn interactions**

## S1. Convergence tests.

DFT calculations were performed using a 500 eV plane wave energy cut-off and a force convergence criterion of  $0.01 \text{ eV \AA}^{-1}$ . Increasing the cut-off to 600 eV for nanofilms of both BCT-ZnO and hex-ZnO polymorphs result in a variation of total energy of less than  $3 \times 10^{-3} \text{ eV/ZnO}$ . Increasing the force convergence criterion for optimisations to  $1 \text{E-}5 \text{ eV \AA}^{-1}$  led to variations in total energy of less than  $5 \times 10^{-7} \text{ eV/ZnO}$ .

The variation in total energy with respect to the **k**-point grid settings employed in the current study are summarised in tables S1 and S2 below.

|                                                                                     | k-point grid setting |              |                     |                     |                     |              |
|-------------------------------------------------------------------------------------|----------------------|--------------|---------------------|---------------------|---------------------|--------------|
|                                                                                     | 2×2×1                | 3×3×1        | 4×4×1               | 5×5×1               | 7×7×1               | 9×9×1        |
| $\Delta E_{ZnO}(\text{eV/ZnO})$ - optimisations                                     | >0.01                | Current work | $>5 \times 10^{-5}$ |                     |                     |              |
| $\Delta E_{ZnO}(\text{eV/ZnO})$ - single point calculations on optimised structures |                      |              |                     | $>5 \times 10^{-5}$ | $>5 \times 10^{-5}$ | Current work |

**Table S1.** Difference in total energy for the 5L BCT-ZnO nanofilm with 0% strain with respect to k-point mesh settings. The energy obtained using settings employed in the current work are taken as a reference.

|                                                                                     | k-point grid setting |              |                     |                     |                     |              |
|-------------------------------------------------------------------------------------|----------------------|--------------|---------------------|---------------------|---------------------|--------------|
|                                                                                     | 2×2×1                | 3×3×1        | 4×4×1               | 5×5×1               | 7×7×1               | 9×9×1        |
| $\Delta E_{ZnO}(\text{eV/ZnO})$ - optimisations                                     | >0.01                | Current work | $>5 \times 10^{-5}$ |                     |                     |              |
| $\Delta E_{ZnO}(\text{eV/ZnO})$ - single point calculations on optimised structures |                      |              |                     | $>5 \times 10^{-5}$ | $>5 \times 10^{-5}$ | Current work |

**Table S2.** Difference in total energy for the 5L hex-ZnO nanofilm with +7% strain with respect to k-point mesh settings. The energy obtained using settings employed in the current study are taken as a reference.

## S2. Comparison between PBE and PBE0

We compare the variation in total energy of a 5L nanofilm using both PBE-based DFT calculations (as employed in the current work) and calculations using the hybrid PBE0<sup>1</sup> functional for a range of in-plane strains. The PBE0-based calculations used the FHI-AIMS<sup>2</sup> all-electron DFT code with a Tier1/light atom-centred numerical basis set. Between strains of -8 and +4% we see a small difference of  $\leq 0.02 \text{ eV/ZnO}$  between the two sets of calculations. For the highest compressive strain this difference slightly increases to  $0.04 \text{ eV/ZnO}$ . Overall, the predicted energetic trends are very similar when employing both functionals.

| Strain (%)                                      | -8   | -2   | +3    | +4    | +9   |
|-------------------------------------------------|------|------|-------|-------|------|
| $\Delta E_{\text{BCT-ZnO}}(\text{eV/ZnO})$ PBE0 | 0.16 | 0.00 | 0.05  | 0.05  | 0.11 |
| $\Delta E_{\text{BCT-ZnO}}(\text{eV/ZnO})$ PBE  | 0.18 | 0.01 | 0.03  | 0.04  | 0.15 |
| $\Delta E(\text{PBE-PBE0})$                     | 0.02 | 0.01 | -0.02 | -0.01 | 0.04 |

**Table S3.** Variance in total energy of 5L nanofilms for a range of in-plane strains with respect to that of bulk BCT-ZnO ( $\Delta E_{\text{BCT-ZnO}}$ ) calculated using: i) the PBE-based computational set-up described in in the current work, and ii) using calculations employing the hybrid PBE0 functional.

### S3. Out-of-plane Zn-Zn interactions

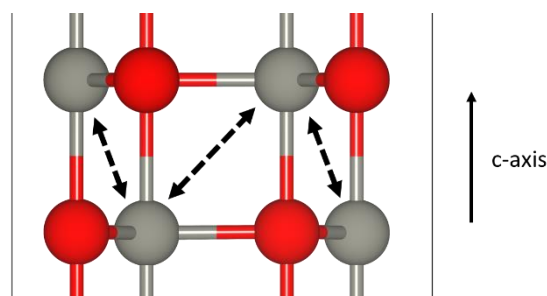

**Figure S1.** Out-of-plane Zn-Zn interactions (dashed arrows) giving rise to Zn4s-Zn4s bonding orbital overlap in the layered-ZnO and hex-ZnO nanofilms.

### References

1. C. Adamo, V. Barone, Toward Reliable Density Functional Methods without Adjustable Parameters: The PBE0 Model. *The Journal of Chemical Physics* 1999, **110**, 6158–6170.
2. V. Blum, R. Gehre, F. Hanke, P. Havu, V. Havu, X. Ren, K. Reuter and M. Scheffler, Ab initio molecular simulations with numeric atom-centered orbitals, *Comput. Phys. Commun.*, 2009, **180**, 2175–2196.
